1                   **Distinct CD8<sup>+</sup> T Cell Programming in the Tumor Microenvironment**

2                   **Contributes to Sex Bias in Bladder Cancer Outcome**

3    Hyunwoo Kwon <sup>1, 2, 3</sup>, Dongjun Chung <sup>3, 4</sup>, Satoshi Kaneko <sup>5</sup>, Anqi Li <sup>3</sup>, Lei Zhou <sup>3</sup>, Brian  
4                   Riesenberg <sup>3</sup>, No-Joon Song <sup>3</sup>, Debasish Sundi <sup>6</sup>, Xue Li <sup>5, \*</sup>, Zihai Li <sup>1, 3, \*</sup>

5  
6    <sup>1</sup> Department of Microbiology and Immunology, Hollings Cancer Center, Medical University of  
7    South Carolina, Charleston SC 29425, USA

8    <sup>2</sup> Medical Scientist Training Program, College of Medicine, Medical University of South Carolina,  
9    Charleston, SC 29425, USA

10   <sup>3</sup> Pelotonia Institute for Immuno-Oncology, The Ohio State University Comprehensive Cancer  
11   Center, Columbus, OH 43210, USA

12   <sup>4</sup> Department of Biomedical Informatics, The Ohio State University, Columbus, OH 43210, USA

13   <sup>5</sup> Department of Urology, Boston Children's Hospital, Harvard Medical School, Boston, MA  
14   02115, USA

15   <sup>6</sup> Department of Urology, The Ohio State University Comprehensive Cancer Center, Columbus,  
16   OH 43210, USA

17  
18   \* Corresponding authors:

19   Correspondence to Zihai Li ([Zihai.Li@osumc.edu](mailto:Zihai.Li@osumc.edu)) or Xue Li ([sean.li@childrens.harvard.edu](mailto:sean.li@childrens.harvard.edu)).

20  
21   **Running title:** Sex differences in bladder cancer outcome are driven by hormonal modulation of  
22   CD8<sup>+</sup> T cell immunity

23   **Keywords:** Sex, Bladder cancer, CD8<sup>+</sup> T cells, Androgen, Exhaustion

24   **Disclosure of Potential Conflicts of Interest:** No potential conflicts of interest were disclosed.

25        **Abstract:** Men and women show striking yet unexplained discrepancies in  
26 incidence, clinical presentation, and therapeutic response across different types of  
27 infectious/autoimmune diseases and malignancies<sup>1,2</sup>. For instance, bladder cancer  
28 shows a 4-fold male-biased incidence that persists after adjustment for known risk  
29 factors<sup>3,4</sup>. Here, we utilize murine bladder cancer models to establish that male-biased  
30 tumor burden is driven by sex differences in endogenous T cell immunity. Notably, sex  
31 differences exist in early fate decisions by intratumoral CD8<sup>+</sup> T cells following their  
32 activation. While female CD8<sup>+</sup> T cells retain their effector function, male counterparts  
33 readily adopt a Tcf1<sup>low</sup>Tim3<sup>-</sup> progenitor state that becomes exhausted over tumor  
34 progression. Human cancers show an analogous male-biased frequency of exhausted  
35 CD8<sup>+</sup> T cells. Mechanistically, we describe an opposing interplay between CD8<sup>+</sup> T cell  
36 intrinsic androgen and type I interferon<sup>5,6</sup> signaling in Tcf1/*Tcf7* regulation and formation  
37 of the progenitor exhausted T cell subset. Consistent with female-biased interferon  
38 response<sup>7</sup>, testosterone-dependent stimulation of Tcf1/*Tcf7* and resistance to interferon  
39 occurs to a greater magnitude in male CD8<sup>+</sup> T cells. Male-biased predisposition for CD8<sup>+</sup>  
40 T cell exhaustion suggests that spontaneous rejection of early immunogenic bladder  
41 tumors is less common in males and carries implications for therapeutic efficacy of  
42 immune checkpoint inhibitors<sup>8,9</sup>.

43        **Main:** Sex is a biological variable with significant influence on immune function<sup>1</sup>.  
44 However, mechanisms underlying sex-biased incidence and mortality of various cancers  
45 arising in non-reproductive organs remain elusive<sup>2</sup>. Indeed, bladder cancer shows a 4-  
46 fold male-biased incidence globally, which cannot be explained by established risk  
47 factors: smoking, exposure to occupational hazards and urinary tract infection<sup>3,4</sup>. Here,

48 we report that bladder cancer male bias, as replicated by multiple murine models, is  
49 largely mediated by sex differences in T cell immunity. Flow cytometric and single cell  
50 RNA-seq analyses of CD8<sup>+</sup> tumor-infiltrating leukocytes (TILs) identified a striking male  
51 bias in the formation of Tcf1<sup>low</sup>Tim3<sup>-</sup> progenitor cells<sup>10</sup> and in their transition to a  
52 hypofunctional Tcf1<sup>-</sup>Tim3<sup>+</sup> exhausted state upon prolonged stimulation. In particular,  
53 androgen signaling was enriched in the progenitor exhausted subset. We found that  
54 testosterone-induced Tcf1, an early molecular orchestrator of an exhaustion-associated  
55 transcriptional landscape<sup>11</sup> in male CD8<sup>+</sup> T cells, is also more resistant to pertinent  
56 repression by female-biased type I interferon signaling<sup>5</sup>. Collectively, these findings  
57 highlight sex differences in intratumoral CD8<sup>+</sup> T cell fate as a potential mechanism  
58 underlying bladder cancer sex bias and identify androgen as a possible target to modulate  
59 CD8<sup>+</sup> TIL exhaustion.

60 ***CD8<sup>+</sup> T cell immunity is required for sex differences in murine bladder cancer***  
61 ***growth.*** Male bias in bladder cancer can be modeled successfully in mice with N-butyl-  
62 N-(4-hydroxybutyl)nitrosamine (BBN)-induced cancer<sup>12,13</sup> and a transplantable syngeneic  
63 bladder cancer cell line MB49<sup>14</sup>. To assess the contribution of adaptive immunity to sex  
64 bias, we compared MB49 growth in male and female wild type (WT) mice, as well as mice  
65 with a deficiency of T cells (*Tcrb/Tcrd*<sup>-/-</sup>), B cells (*Ighm*<sup>-/-</sup>) or both (*Rag2*<sup>-/-</sup>). Consistent with  
66 an earlier report<sup>14</sup>, MB49 grew more aggressively in WT male versus female mice (**Fig.**  
67 **1a**). However, sex differences in MB49 growth were eliminated in *Rag2* and *Tcrb/Tcrd*,  
68 but not *Ighm*, knockout (KO) mice, suggesting that they are driven by sexual dimorphism  
69 in endogenous anti-tumor T cell immunity (**Fig. 1a**). To confirm this finding, we repeated  
70 the experiment in WT mice after antibody-mediated depletion of CD4<sup>+</sup> and/or CD8<sup>+</sup> cells.

71 We found that MB49 grew comparably in male and female mice specifically in the  
72 absence of CD8<sup>+</sup> cells (**Fig. 1b**). Furthermore, we were able to induce sex bias in MB49  
73 growth in *Tcrb/Tcrd* KO mice upon adoptive transfer of CD8<sup>+</sup> T cells from the draining  
74 lymph nodes of MB49-bearing WT mice (**Fig. 1c**). Notably, the sex of recipients exerted  
75 a more significant influence on tumor suppression. These data indicate that CD8<sup>+</sup> T cells,  
76 one of the primary mediators of anti-tumor immunity, are required for sex differences in  
77 the MB49 model.

78 While MB49 was generated through *in vitro* carcinogenesis of male mouse  
79 urothelial cells<sup>15</sup>, enhanced immune responses in female mice are not directed to male-  
80 specific minor antigens, as MB49 has lost the Y chromosome<sup>16</sup>, which was confirmed by  
81 a lack of *Sry* mRNA expression (**Extended Data Fig. 1a**). Furthermore, we generated a  
82 new syngeneic cell line “BKL171” from a BBN-induced bladder tumor in a testes-bearing  
83 Four Core Genotype (FCG) mouse with XX chromosome complement<sup>17</sup> (**Extended Data**  
84 **Fig. 1b**). A clear male-biased tumor growth was also seen with BKL171 that was similarly  
85 dependent on T cell immunity (**Extended Data Fig. 1c**). Finally, we examined sex bias  
86 with the BBN-induced orthotopic bladder cancer model. Consistent with earlier  
87 reports<sup>12,13</sup>, WT female mice survived longer after BBN exposure. However, *Tcrb/Tcrd*  
88 KO mice lacked sex differences in BBN-induced carcinogenesis (**Extended Data Fig.**  
89 **1d**). Collectively, our findings with three murine bladder cancer models – MB49, BKL171  
90 and BBN-induced carcinoma – highlight a previously underappreciated role for sex  
91 differences in T cell immunity, especially CD8<sup>+</sup> T cells, which drive male-biased bladder  
92 tumor growth.

93 ***Female bias of CD8<sup>+</sup> T cell effector response in the tumor microenvironment.***

94 We hypothesized that fundamental sex differences exist in the behaviors of CD8<sup>+</sup> TILs.  
95 Recognizing that immune phenotypes often correlate with the magnitude of tumor burden,  
96 we focused our analysis on days 9 to 11 post MB49 tumor implantation, which coincides  
97 with the time of bifurcation in tumor growth curves for males and females, to identify a  
98 sex-specific driver – not passenger – phenotype. We observed that the number of MB49  
99 tumor-infiltrating and peripheral CD45<sup>+</sup>, CD4<sup>+</sup> and CD8<sup>+</sup> T cells are comparable between  
100 sexes (**Extended Data Fig. 2a-2g**). However, there was an approximately two-fold higher  
101 frequency of polyfunctional CD8<sup>+</sup> T cells that could produce Interferon gamma (IFN $\gamma$ ),  
102 Tumor Necrosis Factor Alpha (TNF $\alpha$ ) and Granzyme B (Gzmb) in day 9 MB49 tumors,  
103 but not in spleens, of female versus male mice (**Fig. 2a**). A similar female bias in effector  
104 response was seen with tumor infiltrating CD4<sup>+</sup> T cells, albeit at a lower magnitude  
105 (**Extended Data Fig. 3a-3b**). Next, we performed single-cell RNA sequencing (scRNA-  
106 seq) on 26,698 CD8<sup>+</sup> T cells from day 10 MB49 tumors (9,955 from female and 16,743  
107 from male;  $n = 3$  mice per sex) to identify a molecular basis for observed sex-specific  
108 differences. The shared nearest neighbor modularity optimization-based clustering  
109 algorithm identified 11 major clusters of cells at various stages of T cell differentiation  
110 (**Fig. 2b and 2d; Supplementary Data 1**). Consistent with the immunogenic nature of  
111 MB49, all but cell clusters 2 and 7 showed signs of activation via T cell receptor (TCR),  
112 as marked by the expression of co-stimulatory receptors (*Cd28*, *Icos*, *Il2ra*), inhibitory  
113 surface receptors (*Pdcd1*, *Havcr2*, *Lag3*, *Ctla4*) and effector molecules (*Ifng*, *Gzma*,  
114 *Gzmb*). Clusters 2 and 7 were instead enriched for *Tcf7*, *Sell* and Ribosomes, which are  
115 characteristic of “stem-like”, “memory-precursor-like” or progenitor populations<sup>5,10</sup>.

116 Additionally, clusters 3/5 and 9 were distinguished by the expression of genes associated  
117 with active cell proliferation (*Top2a*, *Mki67*, Histones, Tubulins and MCM complex) and  
118 type I Interferon signaling, respectively. *Tox* was not enriched in any clusters, indicating  
119 that none of the analyzed CD8<sup>+</sup> T cells in day 10 MB49 had yet reached terminal  
120 differentiation<sup>18-22</sup>.

121 We focused on identifying sex differences in the cluster frequencies and intra-  
122 cluster gene expressions (**Fig. 2c and 2e**). CD8<sup>+</sup> T cells from clusters 2, 7, 1 and 9 were  
123 more predominantly found in MB49 tumors from male mice, with the first two  
124 demonstrating over two-fold higher frequency. All other seven clusters showed a female-  
125 biased frequency with increased transcripts for effector molecules. Clusters 1 and 9  
126 appeared to represent an inflection, at which male and female CD8<sup>+</sup> T cells diverge to  
127 adopt a stem-like versus effector fate, respectively. Specifically, clusters 1 and 9 were  
128 enriched for *Sell*, *Bcl2*, *Tcf7*, *Jun*, *Fos* and *Fosb* transcripts in males. By comparison,  
129 these clusters were enriched for co-stimulatory receptors (*Icos* and *Tnfrsf9*), inhibitory  
130 surface receptors (*Pdcd1*, *Havcr2*, *Lag3* and *Ctla4*), effector molecules (*Gzma* and  
131 *Gzmb*), transcription factors (*Hif1a* and *Id2*), chemokines/cytokines (*Ccl3*, *Ccl4* and *Csf1*)  
132 and migratory receptors (*Ccr2* and *Cxcr6*) in females. In conjunction with flow cytometric  
133 analyses (**Fig. 2a**), we conclude that the female tumor microenvironment favors  
134 development of effector-like CD8<sup>+</sup> T cells with an enhanced ability to control tumor  
135 progression.

136 ***Male bias exists in CD8<sup>+</sup> T cell commitment to exhaustion in the tumor***  
137 ***microenvironment.*** T cell exhaustion defines a state of dysfunction that arises upon  
138 persistent antigen stimulation such as in cancer or chronic infection, with progressive loss

139 of effector and proliferative potential, sustained expression of inhibitory receptors and a  
140 distinct transcriptional landscape<sup>23</sup>. Progenitor exhausted CD8<sup>+</sup> TILs, as defined by their  
141 stem-like genetic profile (*i.e.* *Tcf1/Tcf7*) with relatively little to no expression of checkpoint  
142 receptors, have the potential to proliferate and give rise to effector-like cells, particularly  
143 in response to anti-PD1 therapy<sup>10,24-30</sup>. Given that *Tcf1/Tcf7* plays a critical role in  
144 orchestrating a progenitor exhausted fate while antagonizing an effector program at the  
145 early stage of CD8<sup>+</sup> T cell differentiation<sup>11</sup>, we postulated that male bias in *Tcf7* gene  
146 expression for clusters 1 and 9, as well as in the frequency of *Tcf7*-enriched clusters 2  
147 and 7, may indicate development of progenitor exhausted CD8<sup>+</sup> TILs. To infer their  
148 ontogeny, we used the Monocle-2 algorithm to order single cells in clusters 1, 2, 6, 7, 9  
149 and 10 in pseudotime<sup>31</sup>. This analysis revealed a trajectory originating at State 1, which  
150 then bifurcated into States 2 and 3 (**Fig. 3a**). Surprisingly, State 1 primarily composed of  
151 clusters 6 (highest signs of TCR activation; **Fig. 2e**) and 10. Cells in clusters 10, 1 and 9  
152 showed a male-biased distribution within State 3, which is distinguishable by its stable  
153 *Tcf7* and gradually decreasing *Gzmb* levels (**Fig. 3b**). Clusters 2 and 7 were  
154 predominantly found in State 3 with no sex differences (**Fig. 3a**). Collectively, our analysis  
155 highlights the existence of CD8<sup>+</sup> TIL differentiation from an activated *Tcf7*<sup>-</sup> to a *Tcf7*<sup>+</sup> state,  
156 with pertinent male bias occurring early in the process. To validate this finding, we used  
157 flow cytometry to investigate CD44<sup>+</sup>CD62L<sup>-</sup>CD8<sup>+</sup> TILs before (day 7), during (days 9 and  
158 10) and after (day 12) the sex-based bifurcation in MB49 growth (**Fig. 3c**). On day 7, most  
159 cells were *Tcf1*<sup>high</sup>*Tim3*<sup>-</sup>, which are reminiscent of primed T cells that have just migrated  
160 into the tumor. By days 9 and 10, *Tcf1*<sup>high</sup>*Tim3*<sup>-</sup> cells rapidly converted to *Tcf1*<sup>-</sup>*Tim3*<sup>+</sup> cells  
161 in both sexes, characteristic of cognate tumor antigen recognition and acquisition of an

162 early effector program. On day 12, we observed gradual loss of surface Tim3 expression  
163 and a male-biased formation of Tcf1<sup>low</sup>Tim3<sup>-</sup> cells, consistent with the trajectory that had  
164 been predicted from scRNA-seq data.

165 An important question is if Tcf1<sup>low</sup>Tim3<sup>-</sup>CD8<sup>+</sup> T cells can continue to differentiate  
166 within the tumor microenvironment. To address this question, we utilized an adoptive  
167 transfer model, in which we tracked the fate of these cells using Slamf6 as a cell surface  
168 surrogate for Tcf1 expression<sup>11,24</sup> (**Fig. 3d**). Donor Slamf6<sup>+</sup>Tim3<sup>-</sup>CD8<sup>+</sup> T cells gave rise to  
169 Tcf1<sup>-</sup>Tim3<sup>+</sup> *bona fide* exhausted T cells that were unable to respond to re-stimulation (**Fig.**  
170 **3e; Extended Data Fig. 4a**). As assessed by the lower frequency of Tcf1<sup>low</sup>Tim3<sup>-</sup> and  
171 higher frequency of Tcf1<sup>-</sup>Tim3<sup>+</sup> cells in male recipients, terminal differentiation of  
172 progenitor cells was most accelerated, resulting in the least tumor control, when the sex  
173 of both donor and recipient was male (**Fig. 3e**). Similarly, we observed male-biased  
174 accumulation of Tcf1<sup>low</sup> progenitor exhausted and Tcf1<sup>-</sup>Tox<sup>+</sup> exhausted CD8<sup>+</sup> TILs in day  
175 12 MB49 tumors of WT mice (**Extended Data Fig. 4b-4e**). These findings suggest that  
176 male bias goes beyond formation of progenitor exhausted CD8<sup>+</sup> TILs and persists during  
177 their downstream differentiation. In humans, we observed a higher frequency of  
178 exhausted CD8<sup>+</sup> TILs in men versus women when we probed basal cell carcinoma  
179 samples obtained prior to immunotherapy<sup>32</sup> ("CD8\_ex"; **Extended Data Fig. 5a and 5b**),  
180 as well as treatment-naïve non-small-cell lung cancer<sup>33</sup> ("CD8\_C6-LAYN"; **Extended**  
181 **Data Fig. 5e and 5f**). In addition, although CD8<sup>+</sup> TILs in basal cell carcinoma primarily  
182 consisted of a memory-like phenotype (92% in women; 58% in men), they showed female  
183 bias in their expression of key effector molecules like *KLRG1* and *GZMB* (**Extended Data**  
184 **Fig. 5b**).



185           ***Opposing transcriptional regulation of *Tcf7* by androgen and type I IFN***  
186 ***accompanies sex differences in CD8<sup>+</sup> T cell early fate decision.*** MB49 growth in FCG  
187 mice varied by their sex organ rather than sex chromosome complement, suggesting that  
188 pertinent sex-specific differences in CD8<sup>+</sup> T cell immunity are likely regulated by sex  
189 hormones (**Fig. 4a**). Upon analyzing scRNA-seq profiles of day 10 MB49 CD8<sup>+</sup> TILs and  
190 lymphocytic choriomeningitis virus-specific CD8<sup>+</sup> T cells<sup>11</sup>, we found that androgen, but  
191 not estrogen, signaling was uniquely enriched in clusters with expression profiles  
192 reflecting the *Tcf1*<sup>low</sup> progenitor exhausted state (**Fig. 4b and 4d-4e; Supplementary**  
193 **Data 2**). In humans, androgen signaling also was enriched in activated, but less  
194 differentiated, CD8<sup>+</sup> T cell clusters, while estrogen signaling showed variable enrichment  
195 (**Extended Data Fig. 5c and 5g**). Importantly, we identified a negative correlation  
196 between androgen and type I Interferon (IFN) signaling (Mouse: **Fig. 4c**; Human:  
197 **Extended Data Fig. 5d and 5h**), the latter of which has been shown to repress *Tcf1*  
198 activity and inhibit the formation of progenitor exhausted CD8<sup>+</sup> T cells<sup>5,6</sup>. We validated  
199 our scRNA-seq analyses with FACS-sorted CD8<sup>+</sup> TILs at different stages of  
200 differentiation. Androgen receptor (*Ar*) mRNA not only showed a pan male bias, but also  
201 progressively increased – like *Tcf7* – from activated PD1<sup>+</sup>Slamf6<sup>-</sup> to progenitor exhausted  
202 PD1<sup>-</sup>Slamf6<sup>+</sup> populations (**Fig. 4f**). The PD1<sup>+</sup>Slamf6<sup>+</sup> subset, representing an  
203 intermediate state that lacked markers of type I IFN exposure (i.e., *Isg15*), showed a male  
204 bias in *Tcf7* transcript levels (**Fig. 4f**).

205           Given these findings, we hypothesized that *Tcf7* undergoes opposing  
206 transcriptional regulation by androgen and type I IFN. Indeed, acute testosterone  
207 exposure significantly increased *Tcf7* in male CD8<sup>+</sup> T cells, which was in turn blunted by

208 type I IFN (**Fig. 4g**). Sex differences in the testosterone effect was likely not due to ligand  
209 recognition, as autoregulation of *Ar* was observed in both male and female T cells. We  
210 tested the consequences of testosterone exposure in male and female CD8<sup>+</sup> T cells that  
211 were simultaneously activated *in vitro* through TCR/CD28 (**Fig. 4h**). Optimal T cell  
212 activation, as assessed by CD69 expression, was impaired in the presence of  
213 testosterone. While testosterone significantly increased Tcf1 expression in CD69<sup>+</sup>CD8<sup>+</sup> T  
214 cells of both sexes, its effect was greater in magnitude and more resistant to type I IFN in  
215 males compared with females. Indeed, Tcf1 expression was higher in male CD69<sup>+</sup>CD8<sup>+</sup>  
216 T cells even without acute hormonal treatment.

217 **Discussion:** In contrast to prior studies that have largely focused on sex  
218 differences in tumor cell intrinsic biology in the settings of bladder<sup>13,34</sup> and other cancers<sup>35-</sup>  
219 <sup>40</sup>, our work highlights the critical role of T cell immunity. We demonstrate that distinct  
220 CD8<sup>+</sup> TIL fate determination underlies sex bias in spontaneous rejection of murine  
221 bladder tumor models, which provides a potential mechanism underlying sex differences  
222 in human bladder cancer incidence. Since male-biased predisposition for CD8<sup>+</sup> T cell  
223 exhaustion appears as early as its commitment to the Tcf1<sup>low</sup>Tim3<sup>-</sup> progenitor exhausted  
224 state that can be well-reinvigorated by anti-PD1 therapy<sup>24-28</sup>, our findings support the  
225 previously proposed notion that men may benefit more from immune checkpoint  
226 blockade<sup>8,9</sup>. On balance, molecular profiling efforts of clinical bladder cancer specimens  
227 suggest that basal subtype bladder cancers, which are more common in women<sup>41</sup>, may  
228 have increased therapeutic response to immune checkpoint blockade<sup>34</sup>.

229 Androgens are traditionally considered immunosuppressive<sup>42,43</sup> and believed to  
230 contribute to male bias in bladder cancer risk in mice<sup>12,44</sup> and humans<sup>45</sup>. Here, we show

231 that androgens in the tumor microenvironment negatively impact T cell fate by regulating  
232 *Tcf1/Tcf7*. We also uncovered sex specificity in pertinent androgen effects of T cell  
233 exhaustion and type I IFN-mediated suppression, which may be due to a well-established  
234 female bias in the IFN response and downstream JAK/STAT signaling, both at baseline  
235 and upon active inflammation<sup>7</sup> (**Extended Data Fig. 6**). This simultaneously sheds light  
236 on unresolved mechanisms by which type I IFN promotes CD8<sup>+</sup> T cell terminal  
237 differentiation. As such, future work is necessary to disentangle the molecular circuitry of  
238 androgen, *Tcf1* and type I IFN. In this regard, there exists significant precedent for the  
239 involvement of Nuclear Receptor family members, including *NR4A*<sup>46-49</sup> and *NR3C1*  
240 (glucocorticoid receptor)<sup>50</sup>, in CD8<sup>+</sup> T cell exhaustion. Finally, our work showing sex  
241 specific CD8<sup>+</sup> TIL behavior in bladder cancer highlights the broader opportunities for  
242 discovery due to sex disparities in health and disease.

#### 243 **Methods:**

244 **Mice.** C57BL/6 (WT; Stock number 000664), C57BL/6 *Rag2*<sup>-/-</sup> (008449), *Tcrb/Tcrd*<sup>-/-</sup>  
245 (002122), *Ighm*<sup>-/-</sup> (002288) and FCG<sup>13</sup> (Four Core Genotype; 010905) mice were obtained  
246 from Jackson Labs. 5-12 weeks old mice, maintained in a specific pathogen-free  
247 environment, were used for experiments. Power analysis was not performed for sample  
248 size determination. Experiments – except for those utilizing FCG mice (Boston Children’s  
249 Hospital) – were conducted under protocols approved by the Institutional Animal Care  
250 and Use Committee at the Medical University of South Carolina and the Ohio State  
251 University.

252 **Tumor model.** To induce bladder carcinogenesis, male and female WT and *Tcrb/Tcrd*  
253 knockout or FCG C57BL/6 mice were fed *ad libitum* with 0.1% BBN (TCI America) water

254 for 14 weeks and then switched to normal water. All mice were monitored daily for  
255 morbidity (i.e. palpable tumor/abdominal swelling, hunched posture and urine staining  
256 around perineum). If mice survived the 40-weeks-long regimen, they were considered as  
257 censored from the Kaplan-Meier survival curve analysis. BKL171 was derived from the  
258 bladder tumor of an XXM FCG mouse at the end of a 40 weeks-long BBN regimen.

259 MB49 (a gift from C. Voelkel-Johnson from the Medical University of South Carolina) and  
260 BKL171 mouse urothelial carcinoma cells were cultured in Dulbecco's modified Eagle's  
261 medium with 10% heat-inactivated fetal bovine serum and 1% penicillin/streptomycin.  $5$   
262  $\times 10^5$  tumor cells were resuspended in 100  $\mu$ L ice cold PBS for subcutaneous injection  
263 into the right flank of a mouse. For antibody-mediated T cell depletion experiments, mice  
264 were injected intraperitoneally with 200  $\mu$ g of anti-mouse CD4 (Clone GK1.5, BioXCell)  
265 and/or CD8 neutralizing antibodies (Clone 53-6.7, BioXCell), followed by 100  $\mu$ g  
266 thereafter on the indicated days. Tumor surface area (width  $\times$  length  $\text{mm}^2$ ) was measured  
267 using an electronic caliper every day starting on day 4 post implantation.

268 **Flow cytometry.** Mouse spleens and tumors were mechanically disrupted, with the latter  
269 additionally subjected to digestion with 1 mg/mL Collagenase D (Roche) for 30 min at  
270 37°C while shaken at 125 rpm. Excess volume of ice-cold PBS with 2% bovine serum  
271 albumin was used to inactivate the enzymatic activity. Red Blood Cell Lysis Buffer  
272 (BioLegend) was utilized on tissues before they were passed through 70  $\mu$ m filters to  
273 prepare single cell suspensions. For cytokine production experiments, cells were re-  
274 stimulated by 50 ng/mL PMA (Sigma), 1  $\mu$ g/mL Ionomycin (Sigma) and 1X Brefeldin A  
275 (BioLegend) in a 48-well plate for 2 hours at 37°C. For *in vitro* cultures, purified CD8<sup>+</sup> T

276 cells were left untreated or stimulated with 50 ng/mL testosterone (Sigma) and/or 50 U/mL  
277 mouse IFN alpha A (PBL Assay Science). Cells were stained in 4°C with eFluor506  
278 fixable viability dye for 10 minutes (Invitrogen), followed by extracellular surface markers  
279 and FcR block concurrently for 30 minutes. All intracellular staining was performed using  
280 the Foxp3 transcription factor staining kit (Invitrogen) according to the manufacturer's  
281 instructions. All samples were acquired on LSRFortessa or Cytex Aurora and analysis  
282 was performed using FlowJo VX or OMIQ, respectively.

283 Fluorochrome-conjugated antibodies directed against the following mouse antigens  
284 (Clone) were used: CD45 (30-F11); CD3 (AF-700/17A2), CD8 (53-6.7), CD4 (RM4-5),  
285 PD1 (J43), Tim3 (RMT3-23), Slamf6 (13G3-19D), Tox (REA473), Tcf1 (C63D9), CD44  
286 (IM7), CD62L (MEL-14), CTLA4 (UC10-4B9), Lag3 (C9B7W), Klrg1 (2F1/KLRG1), T-bet  
287 (O4-46), Ki67 (SolA15), TNF $\alpha$  (MP6-XT22), IFN $\gamma$  (XMG1.2), Granzyme B (12-8898-82)  
288 and CD69 (H1.2F3).

289 **Adoptive Transfer.** CD8<sup>+</sup> T cells were isolated by MACS (Miltenyi Biotec) from draining  
290 inguinal lymph nodes of MB49 bearing male and female mice 14 days post implantation  
291 (**Fig. 1c**). Alternatively, they were isolated by FACS from day 12 MB49 TILs in male and  
292 female mice based on Tim3<sup>-</sup> Slamf6<sup>+</sup> surface expression (**Fig. 3c**). Donor cells were  
293 intravenously administered into immunodeficient mice (*Tcrb/Tcrd* KO in **Fig. 1c**; *Rag2* KO  
294 in **Fig. 3c**). Recipient mice were injected with MB49 tumors at indicated time points and  
295 monitored for tumor growth.

296 **Single cell RNA sequencing.** 6 weeks old WT male and female C57BL/6 mice were  
297 inoculated subcutaneously with 5 x 10<sup>5</sup> MB49 tumor cells. On day 10 post inoculation,

298 single cell suspensions were prepared from the tumors after mechanical disruption and  
299 enzymatic digestion with 1 mg/mL Type IV Collagenase (Roche). Live tumor infiltrating  
300 CD8<sup>+</sup> T cells (CD3<sup>+</sup> CD8<sup>+</sup> CD4<sup>-</sup>) were sorted on a BD FACSAria IIu Cell Sorter and  
301 immediately processed for scRNA-seq. Experimental procedures for scRNA-seq followed  
302 established techniques using the Chromium Single Cell 3' Library V3 Kit (10x Genomics).  
303 Briefly, FACS-sorted CD8<sup>+</sup> T cells were loaded onto a 10X Genomics Chip A and  
304 emulsified with 3' Single Cell GEM beads using a Chromium™ Controller. Libraries were  
305 constructed from the barcoded cDNAs (Translational Science Laboratory at the Medical  
306 University of South Carolina) and sequenced for approximately 300 million reads/sample  
307 on a NovaSeq S4 flow cell (Illumina) at the VANTAGE facility (Vanderbilt University  
308 Medical Center).

309 **Single-cell RNA-seq data analysis.** Using the Cell Ranger software, we converted BCL  
310 files into FASTQ files, trimmed adapters and primer sequences, mapped reads to the  
311 mm10 reference genome, and quantified expression levels. In this step, to eliminate low-  
312 quality and dying cells, we filtered out cells with counts less than 200 and those with >5%  
313 mitochondrial counts. Then, we used the Seurat software<sup>51</sup> for the downstream analysis,  
314 based on the count data obtained from Cell Ranger. Specifically, we normalized counts  
315 using the LogNormalize approach, visualized cells in a low-dimensional space using the  
316 Uniform Manifold Approximation and Projection (UMAP) algorithm<sup>52</sup>, and determined cell  
317 clusters using the shared nearest neighbor (SNN) modularity optimization based  
318 clustering algorithm<sup>53</sup>. This process resulted in identification of 11 cell clusters. Then, we  
319 identified cell type markers conserved between males and females for each cell cluster  
320 and also the genes that are differentially expressed (DE) between males and females

321 using a Wilcoxon Rank Sum test and adjusted DE p-values for multiple testing using the  
322 Benjamini-Hochberg procedure<sup>54</sup>. For the pseudotime analysis, we used the Monocle 2  
323 software<sup>55</sup> with the count data for the cell clusters 1, 2, 6, 7, 9, and 10. Specifically, we  
324 ordered genes using the top 1000 genes with the largest variations in expression among  
325 these 6 cell clusters, reduced data dimensionality using the DDRTree algorithm<sup>56</sup>, and  
326 ordered genes along the trajectory. Gene set enrichment analyses were implemented  
327 using the hypergeometric test with the Kyoto Encyclopedia of Genes and Genomes  
328 (KEGG) gene sets obtained from the MSigDB ([https://www.gsea-](https://www.gsea-msigdb.org/gsea/msigdb/index.jsp)  
329 [msigdb.org/gsea/msigdb/index.jsp](https://www.gsea-msigdb.org/gsea/msigdb/index.jsp)).

330 **Secondary analysis of single-cell RNA-seq data.** We implemented secondary  
331 analyses of single cell RNA-seq data obtained from previously published research. For  
332 Guo *et al.*<sup>33</sup>, we downloaded the count data from the GEO database with the accession  
333 number GSE99254 and selected only the cells corresponding to the CD8<sup>+</sup> T cells from  
334 tumors. For Yost *et al.*<sup>32</sup>, we downloaded the count data for basal cell carcinoma from the  
335 GEO database with the accession number GSE123813, and we selected only the cells  
336 corresponding to CD8<sup>+</sup> T cells and pre-treatment. Then, for both datasets, we used the  
337 Seurat analysis workflow described in “Single cell RNA-seq data analysis”. For Chen *et*  
338 *al.*<sup>11</sup>, we downloaded the count data from the GEO database with the accession number  
339 GSE131535. Then, we used the Monocle 2 analysis workflow described in “Single cell  
340 RNA-seq data analysis”.

341 **RNA Isolation and qPCR analysis.** RNA was extracted from FACS/MACS-isolated  
342 CD8<sup>+</sup> T cells and reverse-transcribed using RNeasy Micro Kit (Qiagen) and SuperScript™

343 IV VILO™ Master Mix with ezDNase™ Enzyme (ThermoFisher Scientific), respectively.

344 Quantitative PCR was performed with the following primers:

345 Ar: forward, 5'-TCCAAGACCTATCGAGGAGCG-3';

346 reverse, 5'-GTGGGCTTGAGGAGAACCAT-3';

347 Tcf7: forward, 5'-CCACTCTACGAACATTTTCAGCA-3';

348 reverse, 5'-ACTGGGCCAGCTCACAGTA-3';

349 Havcr2: forward, 5'-TCAGGTCTTACCCTCAACTGTG-3';

350 reverse, 5'-GGCATTCTTACCAACCTCAAACA-3';

351 Isg15: forward, 5'-GGTGTCCGTGACTAACTCCAT-3';

352 reverse, 5'-CTGTACCACTAGCATCACTGTG-3';

353  $\beta$ -actin: forward, 5'-AGCTGAGAGGGAAATCGTG-3';

354 reverse, 5'-TCCAGGGAGGAAGAGGATGC-3'

355 Sry (Set 1): forward, 5'-TTGTCTAGAGAGCATGGAGGGCCATGTCAA-3'

356 reverse, 5'-CCACTCCTCTGTGACACTTTAGCCCTCCGA-3'

357 Sry (Set 2): forward, 5'-TGGGACTGGTGACAATTGTC-3'

358 reverse, 5'-GAGTACAGGTGTGCAGCTCT-3'

359 **Statistical analysis.** Overall survival was analyzed using a log-rank test and tumor  
360 growth was analyzed by a two-way repeated measures ANOVA. Primary method of  
361 statistical analysis for other outcomes was a two-sided independent-sample *t*-test (Mann-  
362 Whitney U test in the event of non-normally distributed data). For all statistical testing, p-  
363 value < 0.05 was considered significant.

364 **Data availability.** The datasets generated during and/or analysed during the current  
365 study are available from the corresponding author on reasonable request.



366 **Acknowledgment:** We thank Cynthia Timmers and Marty Romeo from the Translational  
367 Science Laboratory at the Medical University of South Carolina for their assistance with  
368 the single cell RNA-sequencing efforts. We also thank Eugene Otlz for critical reading  
369 and editing of the manuscript. This work was supported by National Institutes of Health  
370 grants: P01 CA186866, R01 CA213290, R01 CA188419 and R01 AI077283 (Z. Li). H.  
371 Kwon was supported by Doctoral Foreign Study Award from Canadian Institutes of Health  
372 Research (201810DFS-422133-63414) and Graduate Fellowship from the Hollings  
373 Cancer Center in Charleston, SC, USA.

374 **Author contributions:** H.K., X.L. and Z.L. conceived the project. H.K., D.C. and Z.L.  
375 designed experiments and wrote the manuscript. H.K. performed most experiments  
376 described herein and related analyses. H.K. and D.C. performed analyses of mouse and  
377 human scRNA-seq. S.K., A.L., L.Z., B.R. and N.J.S. contributed to *in vivo* tumour  
378 experiments. D.S., X.L and Z.L. provided intellectual input and critical edits to the  
379 manuscript. Z.L. supervised the project. All authors reviewed and approved the  
380 manuscript.

## 381 **References**

- 382 1 Klein, S. L. & Flanagan, K. L. Sex differences in immune responses. *Nat Rev*  
383 *Immunol* **16**, 626-638, doi:10.1038/nri.2016.90 (2016).
- 384 2 Clocchiatti, A., Cora, E., Zhang, Y. & Dotto, G. P. Sexual dimorphism in cancer.  
385 *Nat Rev Cancer* **16**, 330-339, doi:10.1038/nrc.2016.30 (2016).
- 386 3 Bray, F. *et al.* Global cancer statistics 2018: GLOBOCAN estimates of incidence  
387 and mortality worldwide for 36 cancers in 185 countries. *CA Cancer J Clin* **68**,  
388 394-424, doi:10.3322/caac.21492 (2018).
- 389 4 Hartge, P. *et al.* Unexplained excess risk of bladder cancer in men. *J Natl Cancer*  
390 *Inst* **82**, 1636-1640, doi:10.1093/jnci/82.20.1636 (1990).
- 391 5 Wu, T. *et al.* The TCF1-Bcl6 axis counteracts type I interferon to repress  
392 exhaustion and maintain T cell stemness. *Sci Immunol* **1**,  
393 doi:10.1126/sciimmunol.aai8593 (2016).

- 394 6 LaFleur, M. W. *et al.* PTPN2 regulates the generation of exhausted CD8(+) T cell  
395 subpopulations and restrains tumor immunity. *Nat Immunol* **20**, 1335-1347,  
396 doi:10.1038/s41590-019-0480-4 (2019).
- 397 7 Gal-Oz, S. T. *et al.* ImmGen report: sexual dimorphism in the immune system  
398 transcriptome. *Nat Commun* **10**, 4295, doi:10.1038/s41467-019-12348-6 (2019).
- 399 8 Conforti, F. *et al.* Cancer immunotherapy efficacy and patients' sex: a systematic  
400 review and meta-analysis. *Lancet Oncol* **19**, 737-746, doi:10.1016/S1470-  
401 2045(18)30261-4 (2018).
- 402 9 Kwon, H., Lin, C. Y., Chung, D., Li, X. & Li, Z. Sex as a predictor of response to  
403 cancer immunotherapy. *Lancet Oncol* **19**, e379, doi:10.1016/S1470-  
404 2045(18)30445-5 (2018).
- 405 10 Kurtulus, S. *et al.* Checkpoint Blockade Immunotherapy Induces Dynamic  
406 Changes in PD-1(-)CD8(+) Tumor-Infiltrating T Cells. *Immunity* **50**, 181-194  
407 e186, doi:10.1016/j.immuni.2018.11.014 (2019).
- 408 11 Chen, Z. *et al.* TCF-1-Centered Transcriptional Network Drives an Effector  
409 versus Exhausted CD8 T Cell-Fate Decision. *Immunity* **51**, 840-855 e845,  
410 doi:10.1016/j.immuni.2019.09.013 (2019).
- 411 12 Bertram, J. S. & Craig, A. W. Specific induction of bladder cancer in mice by  
412 butyl-(4-hydroxybutyl)-nitrosamine and the effects of hormonal modifications on  
413 the sex difference in response. *Eur J Cancer* **8**, 587-594, doi:10.1016/0014-  
414 2964(72)90137-5 (1972).
- 415 13 Kaneko, S. & Li, X. X chromosome protects against bladder cancer in females  
416 via a KDM6A-dependent epigenetic mechanism. *Sci Adv* **4**, eaar5598,  
417 doi:10.1126/sciadv.aar5598 (2018).
- 418 14 White-Gilbertson, S., Davis, M., Voelkel-Johnson, C. & Kasman, L. M. Sex  
419 differences in the MB49 syngeneic, murine model of bladder cancer. *Bladder*  
420 *(San Franc)* **3**, doi:10.14440/bladder.2016.73 (2016).
- 421 15 Summerhayes, I. C. & Franks, L. M. Effects of donor age on neoplastic  
422 transformation of adult mouse bladder epithelium in vitro. *J Natl Cancer Inst* **62**,  
423 1017-1023 (1979).
- 424 16 Fabris, V. T. *et al.* Cytogenetic characterization of the murine bladder cancer  
425 model MB49 and the derived invasive line MB49-I. *Cancer Genet* **205**, 168-176,  
426 doi:10.1016/j.cancergen.2012.02.002 (2012).
- 427 17 De Vries, G. J. *et al.* A model system for study of sex chromosome effects on  
428 sexually dimorphic neural and behavioral traits. *J Neurosci* **22**, 9005-9014  
429 (2002).
- 430 18 Scott, A. C. *et al.* TOX is a critical regulator of tumour-specific T cell  
431 differentiation. *Nature* **571**, 270-274, doi:10.1038/s41586-019-1324-y (2019).
- 432 19 Alfei, F. *et al.* TOX reinforces the phenotype and longevity of exhausted T cells in  
433 chronic viral infection. *Nature* **571**, 265-269, doi:10.1038/s41586-019-1326-9  
434 (2019).
- 435 20 Yao, C. *et al.* Single-cell RNA-seq reveals TOX as a key regulator of CD8(+) T  
436 cell persistence in chronic infection. *Nat Immunol* **20**, 890-901,  
437 doi:10.1038/s41590-019-0403-4 (2019).
- 438 21 Khan, O. *et al.* TOX transcriptionally and epigenetically programs CD8(+) T cell  
439 exhaustion. *Nature* **571**, 211-218, doi:10.1038/s41586-019-1325-x (2019).

- 440 22 Seo, H. *et al.* TOX and TOX2 transcription factors cooperate with NR4A  
441 transcription factors to impose CD8(+) T cell exhaustion. *Proc Natl Acad Sci U S*  
442 *A* **116**, 12410-12415, doi:10.1073/pnas.1905675116 (2019).
- 443 23 Thommen, D. S. & Schumacher, T. N. T Cell Dysfunction in Cancer. *Cancer Cell*  
444 **33**, 547-562, doi:10.1016/j.ccell.2018.03.012 (2018).
- 445 24 Miller, B. C. *et al.* Subsets of exhausted CD8(+) T cells differentially mediate  
446 tumor control and respond to checkpoint blockade. *Nat Immunol* **20**, 326-336,  
447 doi:10.1038/s41590-019-0312-6 (2019).
- 448 25 Blackburn, S. D., Shin, H., Freeman, G. J. & Wherry, E. J. Selective expansion of  
449 a subset of exhausted CD8 T cells by alphaPD-L1 blockade. *Proc Natl Acad Sci*  
450 *U S A* **105**, 15016-15021, doi:10.1073/pnas.0801497105 (2008).
- 451 26 Brummelman, J. *et al.* High-dimensional single cell analysis identifies stem-like  
452 cytotoxic CD8(+) T cells infiltrating human tumors. *J Exp Med* **215**, 2520-2535,  
453 doi:10.1084/jem.20180684 (2018).
- 454 27 Sade-Feldman, M. *et al.* Defining T Cell States Associated with Response to  
455 Checkpoint Immunotherapy in Melanoma. *Cell* **175**, 998-1013 e1020,  
456 doi:10.1016/j.cell.2018.10.038 (2018).
- 457 28 Im, S. J. *et al.* Defining CD8+ T cells that provide the proliferative burst after PD-  
458 1 therapy. *Nature* **537**, 417-421, doi:10.1038/nature19330 (2016).
- 459 29 Thommen, D. S. *et al.* A transcriptionally and functionally distinct PD-1(+) CD8(+)  
460 T cell pool with predictive potential in non-small-cell lung cancer treated with PD-  
461 1 blockade. *Nat Med* **24**, 994-1004, doi:10.1038/s41591-018-0057-z (2018).
- 462 30 Jansen, C. S. *et al.* An intra-tumoral niche maintains and differentiates stem-like  
463 CD8 T cells. *Nature* **576**, 465-470, doi:10.1038/s41586-019-1836-5 (2019).
- 464 31 Qiu, X. *et al.* Single-cell mRNA quantification and differential analysis with  
465 Census. *Nat Methods* **14**, 309-315, doi:10.1038/nmeth.4150 (2017).
- 466 32 Yost, K. E. *et al.* Clonal replacement of tumor-specific T cells following PD-1  
467 blockade. *Nat Med* **25**, 1251-1259, doi:10.1038/s41591-019-0522-3 (2019).
- 468 33 Guo, X. *et al.* Global characterization of T cells in non-small-cell lung cancer by  
469 single-cell sequencing. *Nat Med* **24**, 978-985, doi:10.1038/s41591-018-0045-3  
470 (2018).
- 471 34 Robertson, A. G. *et al.* Comprehensive Molecular Characterization of Muscle-  
472 Invasive Bladder Cancer. *Cell* **171**, 540-556 e525, doi:10.1016/j.cell.2017.09.007  
473 (2017).
- 474 35 Li, C. H., Haider, S., Shiah, Y. J., Thai, K. & Boutros, P. C. Sex Differences in  
475 Cancer Driver Genes and Biomarkers. *Cancer Res* **78**, 5527-5537,  
476 doi:10.1158/0008-5472.CAN-18-0362 (2018).
- 477 36 Dunford, A. *et al.* Tumor-suppressor genes that escape from X-inactivation  
478 contribute to cancer sex bias. *Nat Genet* **49**, 10-16, doi:10.1038/ng.3726 (2017).
- 479 37 Yuan, Y. *et al.* Comprehensive Characterization of Molecular Differences in  
480 Cancer between Male and Female Patients. *Cancer Cell* **29**, 711-722,  
481 doi:10.1016/j.ccell.2016.04.001 (2016).
- 482 38 Naugler, W. E. *et al.* Gender disparity in liver cancer due to sex differences in  
483 MyD88-dependent IL-6 production. *Science* **317**, 121-124,  
484 doi:10.1126/science.1140485 (2007).

- 485 39 Li, Z., Tuteja, G., Schug, J. & Kaestner, K. H. Foxa1 and Foxa2 are essential for  
486 sexual dimorphism in liver cancer. *Cell* **148**, 72-83,  
487 doi:10.1016/j.cell.2011.11.026 (2012).
- 488 40 Yang, W. *et al.* Sex differences in GBM revealed by analysis of patient imaging,  
489 transcriptome, and survival data. *Sci Transl Med* **11**,  
490 doi:10.1126/scitranslmed.aao5253 (2019).
- 491 41 de Jong, J. J. *et al.* (in press) Distribution of Molecular Subtypes in Muscle-  
492 invasive Bladder Cancer Is Driven by Sex-specific Differences. *Eur Urol Oncol*,  
493 doi:10.1016/j.euo.2020.02.010 (2020).
- 494 42 Roden, A. C. *et al.* Augmentation of T cell levels and responses induced by  
495 androgen deprivation. *J Immunol* **173**, 6098-6108,  
496 doi:10.4049/jimmunol.173.10.6098 (2004).
- 497 43 Kissick, H. T. *et al.* Androgens alter T-cell immunity by inhibiting T-helper 1  
498 differentiation. *Proc Natl Acad Sci U S A* **111**, 9887-9892,  
499 doi:10.1073/pnas.1402468111 (2014).
- 500 44 Miyamoto, H. *et al.* Promotion of bladder cancer development and progression by  
501 androgen receptor signals. *J Natl Cancer Inst* **99**, 558-568,  
502 doi:10.1093/jnci/djk113 (2007).
- 503 45 Morales, E. E. *et al.* Finasteride Reduces Risk of Bladder Cancer in a Large  
504 Prospective Screening Study. *Eur Urol* **69**, 407-410,  
505 doi:10.1016/j.eururo.2015.08.029 (2016).
- 506 46 Chen, J. *et al.* NR4A transcription factors limit CAR T cell function in solid  
507 tumours. *Nature* **567**, 530-534, doi:10.1038/s41586-019-0985-x (2019).
- 508 47 Martinez, G. J. *et al.* The transcription factor NFAT promotes exhaustion of  
509 activated CD8(+) T cells. *Immunity* **42**, 265-278,  
510 doi:10.1016/j.immuni.2015.01.006 (2015).
- 511 48 Mognol, G. P. *et al.* Exhaustion-associated regulatory regions in CD8(+) tumor-  
512 infiltrating T cells. *Proc Natl Acad Sci U S A* **114**, E2776-E2785,  
513 doi:10.1073/pnas.1620498114 (2017).
- 514 49 Liu, X. *et al.* Genome-wide analysis identifies NR4A1 as a key mediator of T cell  
515 dysfunction. *Nature* **567**, 525-529, doi:10.1038/s41586-019-0979-8 (2019).
- 516 50 Acharya, N. *et al.* An endogenous glucocorticoid-cytokine signaling circuit  
517 promotes CD8+ T cell dysfunction in the tumor microenvironment. *bioRxiv*  
518 (2019).
- 519 51 Butler, A., Hoffman, P., Smibert, P., Papalexi, E. & Satija, R. Integrating single-  
520 cell transcriptomic data across different conditions, technologies, and species.  
521 *Nat Biotechnol* **36**, 411-420, doi:10.1038/nbt.4096 (2018).
- 522 52 McInnes, L., Healy, J. & Melville, J. UMAP: Uniform Manifold Approximation and  
523 Projection for Dimension Reduction. *arXiv e-prints*, arXiv:1802.03426 (2018).  
524 <<https://ui.adsabs.harvard.edu/abs/2018arXiv180203426M>>.
- 525 53 Waltman, L. & van Eck, N. J. A smart local moving algorithm for large-scale  
526 modularity-based community detection. *The European Physical Journal B:  
527 Condensed Matter and Complex Systems* **86**, 14, doi:10.1140/epjb/e2013-  
528 40829-, (2013).
- 529 54 Benjamini, Y. & Hochberg, Y. Controlling the False Discovery Rate: A Practical  
530 and Powerful Approach to Multiple Testing. *Journal of the Royal Statistical*

- 531            *Society: Series B (Methodological)* **57**, 289-300, doi:10.1111/j.2517-  
532            6161.1995.tb02031.x (1995).
- 533    55    Trapnell, C. *et al.* The dynamics and regulators of cell fate decisions are revealed  
534            by pseudotemporal ordering of single cells. *Nat Biotechnol* **32**, 381-386,  
535            doi:10.1038/nbt.2859 (2014).
- 536    56    Mao, Q., Wang, L., Goodison, S. & Sun, Y. Dimensionality Reduction Via Graph  
537            Structure Learning. *Proceedings of the 21th ACM SIGKDD International*  
538            *Conference on Knowledge Discovery and Data Mining*, 765–774,  
539            doi:10.1145/2783258.2783309 (2015).

540

541

542

543

544

545

546

547

548

549

550

551

552

553

554

555

556

557

558

559

560

561

562

563

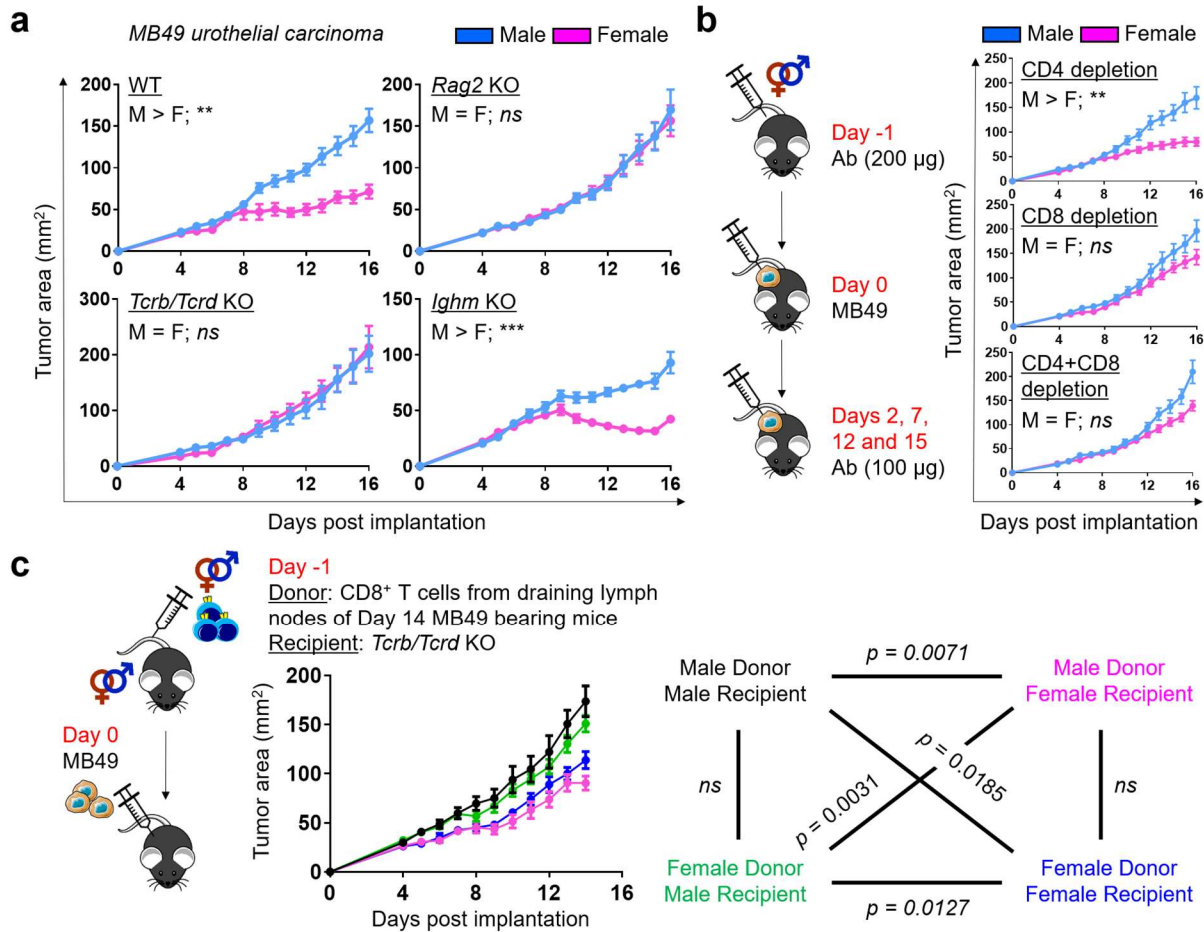

564

565 **Fig. 1 | CD8<sup>+</sup> T cell immunity is required for sex differences in murine bladder**  
 566 **cancer growth.** **a**, Growth of MB49 in mice with indicated genotypes after subcutaneous  
 567 implantation. **b**, Antibody-mediated depletion of CD4<sup>+</sup> and/or CD8<sup>+</sup> cells in WT mice  
 568 challenged with MB49. Each mouse was injected intraperitoneally with 200 µg anti-mouse  
 569 CD4 (GK1.5 clone) and/or CD8 (53-6.7 clone) antibodies on day -1 and 100 µg on other  
 570 indicated days. **c**, Growth of MB49 in *Tcrb/Tcrd* knockout mice that were adoptively  
 571 transferred with  $5 \times 10^5$  CD8<sup>+</sup> T cells from the draining lymph nodes of WT mice 14 days  
 572 post subcutaneous MB49 challenge. Colors for all possible donor-recipient combinations  
 573 and corresponding statistics are shown. **a-c**, Mean tumor area (mm<sup>2</sup>) ± SEM are reported,  
 574 with statistical significance determined using the repeated measures two-way ANOVA.  $n$   
 575 = 4-10 mice per group. \* $p \leq 0.05$ , \*\* $p \leq 0.01$ , \*\*\* $p \leq 0.001$ , ns = not significant.

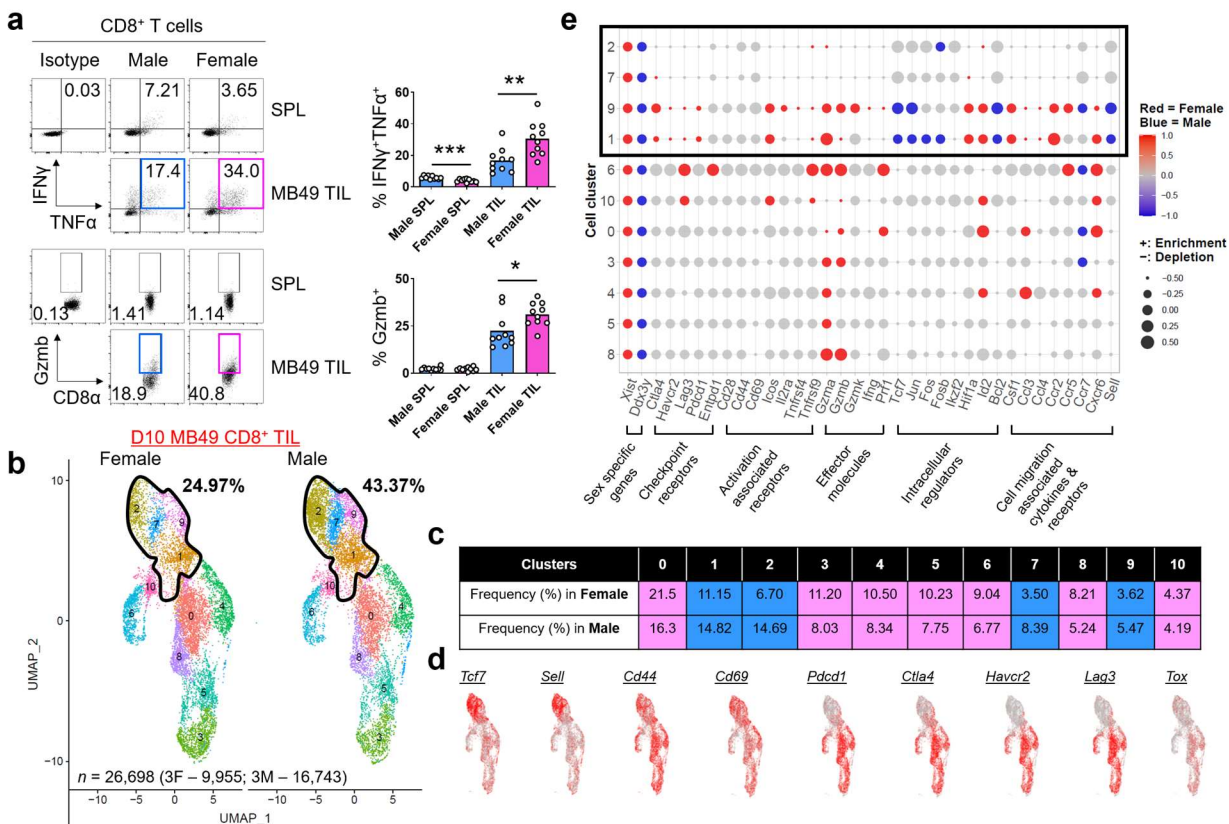

576

577 **Fig. 2 | Female bias exists in CD8<sup>+</sup> T cell effector response in the tumor**  
 578 **microenvironment.** **a**, Flow cytometric analysis of IFN $\gamma$  and TNF $\alpha$  (top) and Gzmb  
 579 (bottom) expression in CD8<sup>+</sup> T cells from the spleens (SPL) and tumors (TIL) of male and  
 580 female mice 9 days post subcutaneous MB49 challenge. Cells were stimulated *ex vivo*  
 581 with 50 ng/mL PMA, 1  $\mu$ g/mL Ionomycin and 1X Brefeldin A for 2 hours. Left:  
 582 Representative flow plots; Right: Frequency of CD8<sup>+</sup> T cells expressing indicated effector  
 583 molecules, with the box height representing the mean of all shown biological replicates.  
 584 Statistical significance was determined using the Student's *t* test. \**p*  $\leq$  0.05, \*\**p*  $\leq$  0.01,  
 585 \*\*\**p*  $\leq$  0.001. **b**, UMAP of 26,698 CD8<sup>+</sup> TIL (3 female mice – 9,955; 3 male mice – 16,743)  
 586 scRNA-seq profiles, colored by cluster. Cells were sorted by FACS from day 10 MB49  
 587 tumors. Same number of cells (9,955) is shown here for each sex for visualization. Solid  
 588 black lines in **b** and **e** enclose 4 clusters that show male-biased frequency as indicated in  
 589 blue in **c**. **d**, Expression of indicated genes in individual cells from **b**. **e**, Dot plot indicating  
 590 the relative expression of a given gene in the 11 clusters and its sex bias by size and  
 591 color, respectively. Sex-biased expression was assessed using a Mann-Whitney U test  
 592 and its significance was determined at the nominal level of 0.05 after Benjamini-Hochberg  
 593 multiple testing correction. Blue: Male bias; Red: Female bias; Gray: No sex bias.

594

595

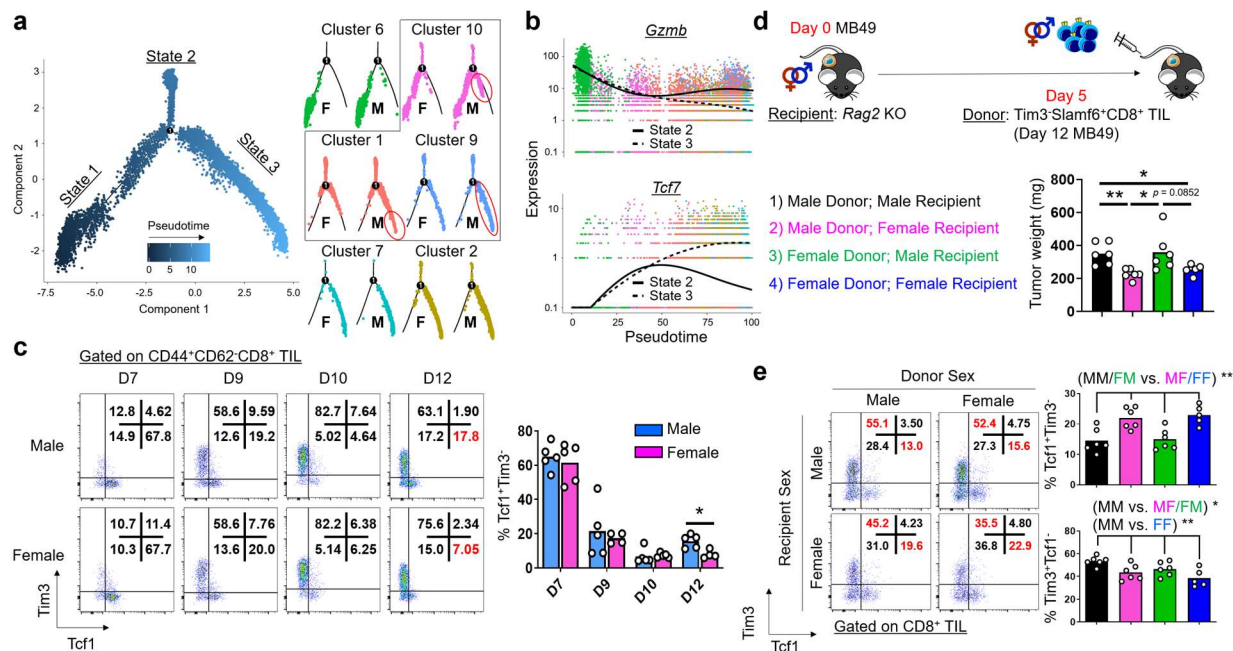

596

597 **Fig. 3 | Male bias exists in CD8<sup>+</sup> T cell commitment to exhaustion in the tumor**  
 598 **microenvironment.** **a**, Pseudotime analysis using Monocle-2<sup>55</sup> across CD8<sup>+</sup> T cells  
 599 belonging to clusters 1, 2, 6, 7, 9 and 10 in day 10 MB49 tumors, from which 3 branches  
 600 were identified: States 1 (progenitor), 2 and 3 (progeny). Each dot indicates a CD8<sup>+</sup> T cell  
 601 as colored by pseudotime (left; all cells) or cluster (right; stratified by sex). Boxed clusters  
 602 show male-biased distribution in State 3 as illustrated in red. **b**, Expression of *Gzmb* and  
 603 *Tcf7* across pseudotime for States 2 (solid) and 3 (dotted). **c**, Flow cytometric analysis of  
 604 Tim3 and Tcf1 expression in CD44<sup>+</sup>CD62<sup>-</sup>CD8<sup>+</sup> T cells from tumors of male and female  
 605 mice 7, 9, 10 and 12 days post subcutaneous MB49 challenge. Left: Representative flow  
 606 plots; Right: Frequency of Tcf1<sup>+</sup>Tim3<sup>-</sup>CD8<sup>+</sup> T cells, with the box height representing the  
 607 mean of all shown biological replicates. Blue: Male; Pink: Female. **d**, Growth of MB49 in  
 608 *Rag2* KO mice that were adoptively transferred with 1.75 x 10<sup>3</sup> Tim3<sup>+</sup>Slamf6<sup>+</sup>CD8<sup>+</sup> T cells  
 609 from day 12 MB49 tumors of WT mice. Colors for all possible donor-recipient  
 610 combinations are listed. Tumor weights on day 14 are reported. **e**, Flow cytometric  
 611 analysis of Tim3 and Tcf1 expression in donor TILs on day 14 from **d**. Left: Representative  
 612 flow plots; Right: Frequency of Tcf1<sup>+</sup>Tim3<sup>-</sup>CD8<sup>+</sup> T cells, with the box height representing  
 613 the mean of all shown biological replicates. **c-e**, Statistical significance was determined  
 614 by the Student's *t* test. \**p* ≤ 0.05, \*\**p* ≤ 0.01.



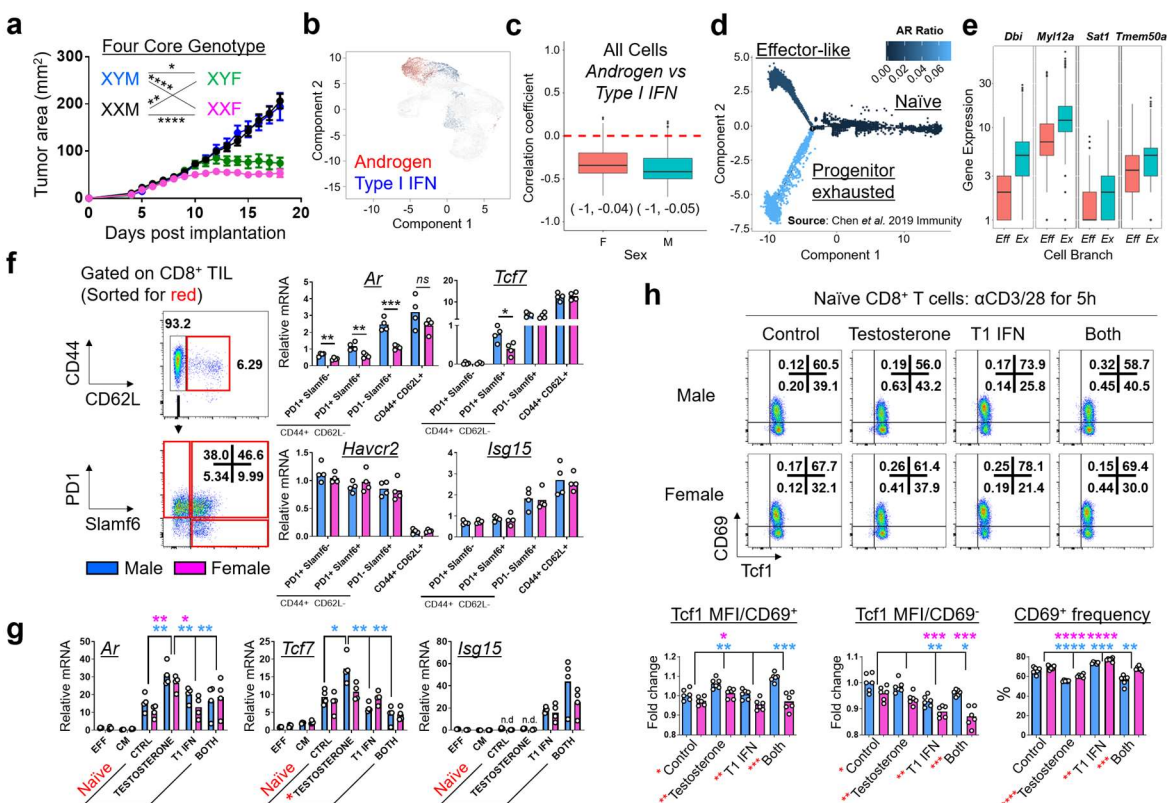

615

616 **Fig. 4 | Oposing transcriptional regulation of *Tcf7* by androgen and type I IFN**  
617 **accompanies sex differences in CD8<sup>+</sup> T cell early fate decision.** **a**, Growth of MB49  
618 in Four Core Genotype mice. Mean tumor area (mm<sup>2</sup>) ± SEM are reported, with statistical  
619 significance determined using the repeated measures two-way ANOVA. *n* = 7-11 mice  
620 per group. **b**, Enrichment of androgen response (red) and type I IFN (blue) signatures in  
621 CD8<sup>+</sup> T cells from day 10 MB49 tumors. **c**, Correlation between androgen and type I IFN  
622 signatures, with 95% confidence intervals in brackets. **d**, Pseudotime analysis of virus-  
623 specific CD8<sup>+</sup> T cells from Chen *et al* data<sup>11</sup> using Monocle-2, as colored by the relative  
624 enrichment of androgen response signature. **e**, Boxplots show expression of genes from  
625 the androgen response signature in effector-like (“Eff”; orange) and progenitor exhausted  
626 (“Ex”; green) cells. **f and g**, qPCR analysis for indicated genes using **f**) FACS sorted CD8<sup>+</sup>  
627 T cell subsets (red box) from day 14 MB49 tumors **g**) effector memory (“EFF”), central  
628 memory (“CM”) or naïve CD8<sup>+</sup> T cells from spleens and peripheral lymph nodes. Naïve  
629 CD8<sup>+</sup> T cells were stimulated with testosterone, type I IFN or both for 6 hours. Relative  
630 gene expressions are shown with the box height representing the mean of all shown  
631 biological replicates. **h**, Flow cytometric analysis of CD69 and Tcf1 expression in  
632 activated CD8<sup>+</sup> T cells in the absence or presence of testosterone, type I IFN or both.  
633 Top: Representative flow plots; Bottom: Frequency of CD69<sup>+</sup> cells and Tcf1 expression in  
634 CD69<sup>±</sup> cells, with the box height representing the mean of all shown biological replicates.  
635 **f-h**, Statistical significance was determined by the Student’s *t*-test. \**p* ≤ 0.05, \*\**p* ≤ 0.01,  
636 \*\*\**p* ≤ 0.001, \*\*\*\**p* ≤ 0.0001. Blue: Male; Pink: Female. Red asterisks indicate significant  
637 sex differences.

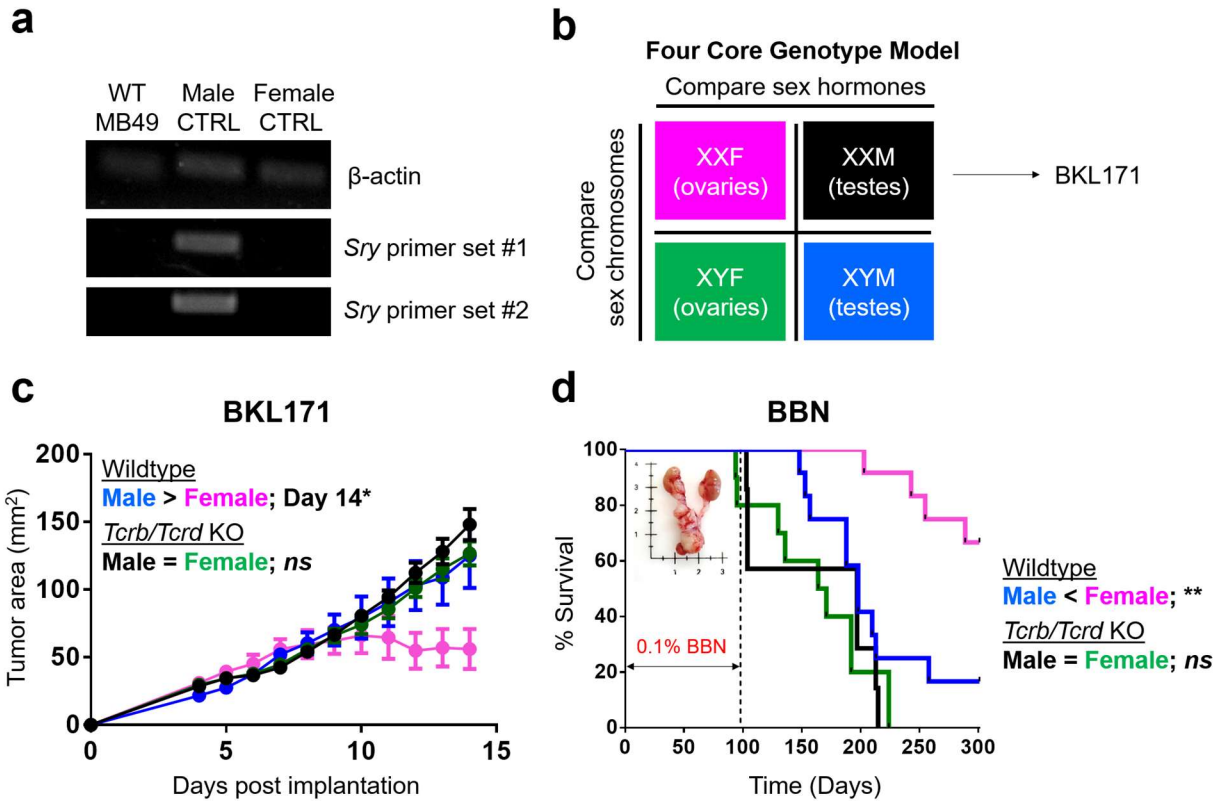

638

639 **Extended Data Fig. 1 | T cell immunity underlies sex biased outcomes in murine**  
 640 **bladder cancer models.** **a**, RT-PCR for qualitative detection of  $\beta$ -actin and Y-  
 641 chromosome encoded *Sry* gene transcripts from MB49 cells. DNA extracted from tails of  
 642 male and female mice are included as controls. **b**, Diagram representation of Four Core  
 643 Genotype (FCG) mouse model. BKL171 was generated from BBN-induced bladder tumor  
 644 of an XXM FCG mouse. **c**, Growth of BKL171 in mice with indicated genotypes after  
 645 subcutaneous implantation. Mean tumor area (mm<sup>2</sup>)  $\pm$  SEM are indicated, with following  
 646 *p* values determined using the Student's *t* test. Day 12 = 0.0753; Day 13 = 0.0776; Day  
 647 14 = 0.0487(\*) for WT male and female (*n* = 4 each). No significant differences exist  
 648 between *Tcrb/Tcrd* KO male and female (*n* = 10 and 9, respectively). **d**, BBN-induced  
 649 carcinogenesis model. Mice are exposed *ad libitum* to 0.1% BBN in drinking water for the  
 650 first 14 weeks to induce bladder cancer formation and then monitored for a total of 300  
 651 days. Percent survival is shown, with statistical significance determined using the log rank  
 652 test. \*\**p*  $\leq$  0.01 between WT male and female (*n* = 12 each). No significant differences  
 653 (*ns*) between *Tcrb/Tcrd* KO male and female (*n* = 7 and 10, respectively).

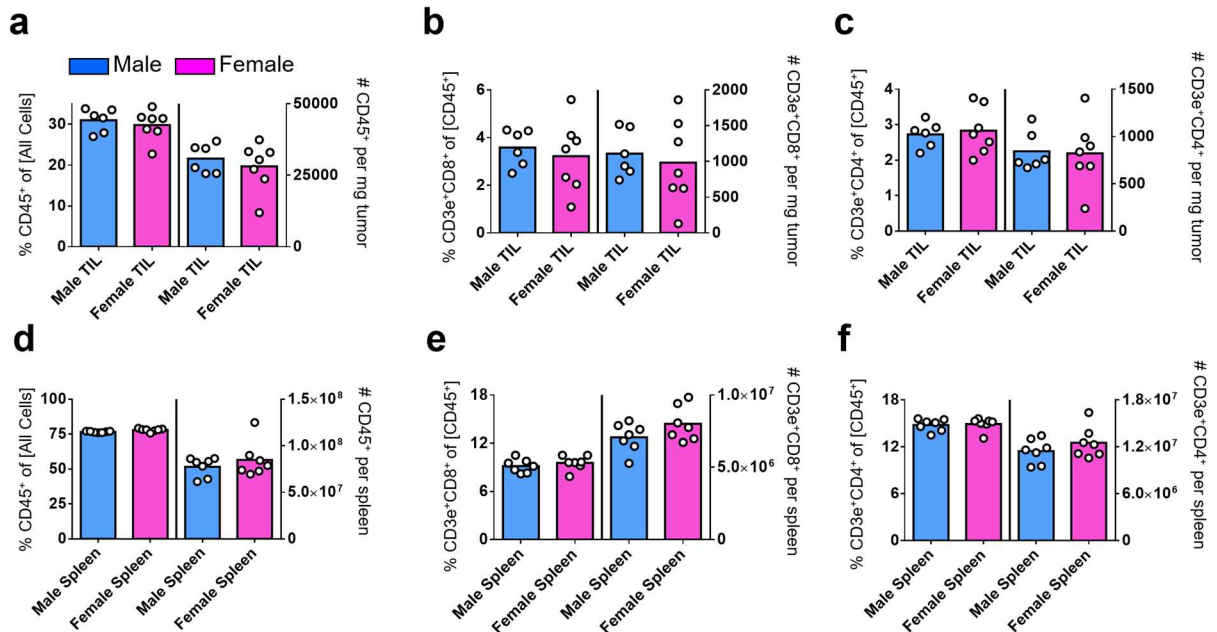

654

655 **Extended Data Fig. 2 | T cell numbers are comparable between male and female**  
656 **MB49 bearing mice.** CD45<sup>+</sup>, CD3<sup>+</sup>CD8<sup>+</sup> and CD3<sup>+</sup>CD4<sup>+</sup> immune cell frequency and  
657 absolute number – as assessed by flow cytometry – in day 9 MB49 tumors (**a-c**) or  
658 spleens (**d-f**) are indicated in left and right y axes of each graph, respectively. Box height  
659 represents the mean of all shown biological replicates. No significant sex-based  
660 differences were detected. Blue = Male; Pink = Female.

661

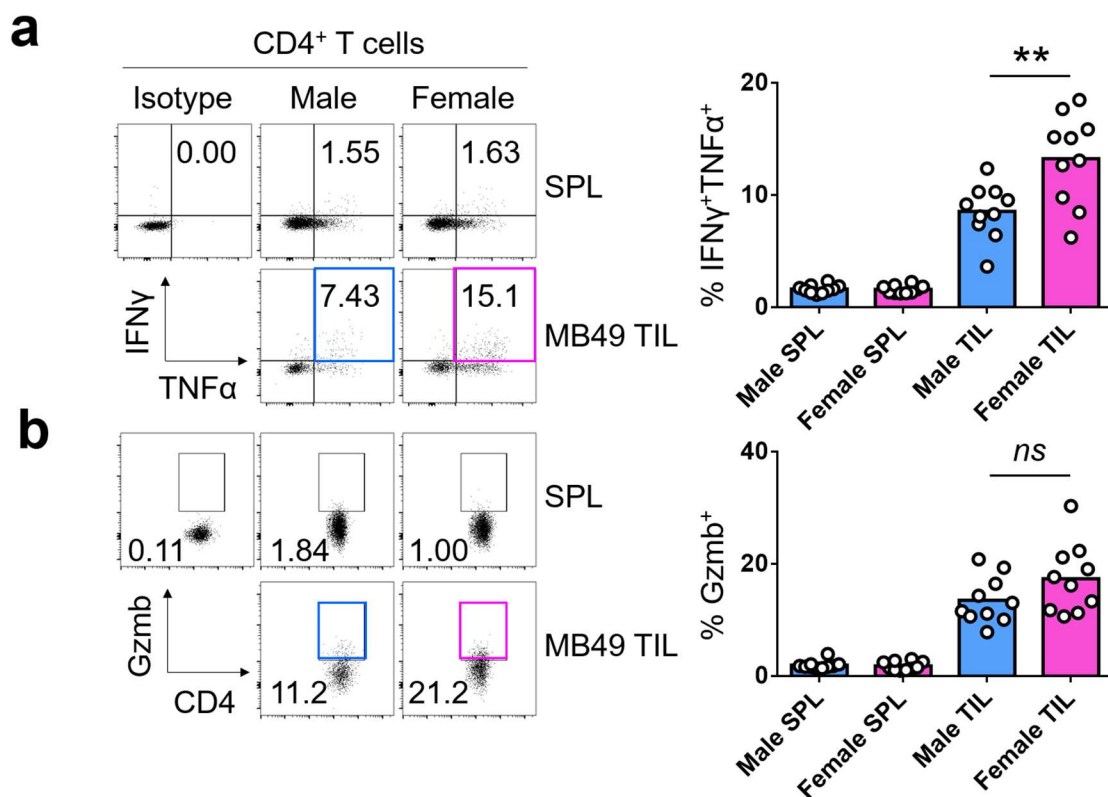

662

663 **Extended Data Fig. 3 | Female bias exists in CD4<sup>+</sup> T cell effector response in the**  
664 **tumor microenvironment.** Flow cytometric analysis of IFN $\gamma$  and TNF $\alpha$  (a) and Gzmb (b)  
665 expression in CD4<sup>+</sup> T cells from the spleens (SPL) and tumors (TIL) of male and female  
666 mice 9 days post subcutaneous MB49 challenge. Cells were stimulated *ex vivo* with 50  
667 ng/mL PMA, 1  $\mu$ g/mL Ionomycin and 1X Brefeldin A for 2 hours in 37 degrees Celsius.  
668 Left: Representative flow plots; Right: Frequency of CD4<sup>+</sup> T cells expressing indicated  
669 effector molecules, with the box height representing the mean of all shown biological  
670 replicates. Statistical significance was determined using the Student's *t*-test. \*\**p*  $\leq$  0.01.  
671 *ns* = not significant.

672

673

674

675

676

677

678

679

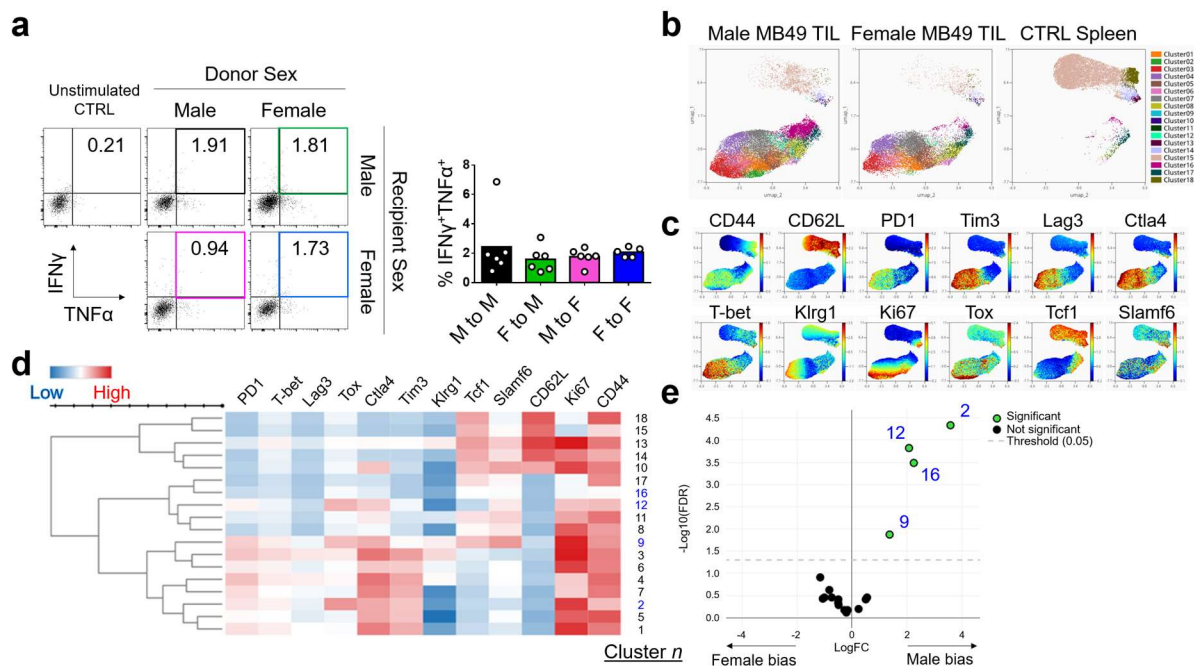

680

681 **Extended Data Fig. 4 | Male bias exists in CD8<sup>+</sup> T cell commitment to exhaustion in**  
 682 **the tumor microenvironment. a**, Flow cytometric analysis of IFN $\gamma$  and TNF $\alpha$  expression  
 683 in donor male and female CD8<sup>+</sup> T cells from tumors of male and female *Rag2* knockout  
 684 recipient mice 12 days post subcutaneous MB49 challenge (see **Fig. 3d-e**). Cells were  
 685 stimulated *ex vivo* with 50 ng/mL PMA, 1  $\mu$ g/mL Ionomycin and 1X Brefeldin A for 2 hours.  
 686 Left: Representative flow plots; Right: Frequency of CD8<sup>+</sup> T cells expressing indicated  
 687 effector molecules, with the box height representing the mean of all shown biological  
 688 replicates. **b-e**, Spectral flow cytometry analysis of CD8<sup>+</sup> T cells (Male = 22,875 cells;  
 689 Female = 14,264 cells; Spleen control = 14,606 cells; *n* = 5 mice per sex) from day 12  
 690 MB49 tumors. **b**, UMAP as colored by cluster. **c**, Expression of indicated proteins in  
 691 individual cells from **b**. **d**, Cluster visualization by heatmap. Clusters with differential  
 692 abundance between sexes, as analyzed via EdgeR, are indicated by blue font and green  
 693 circles in a volcano plot in **e**.

694

695

696

697

698

699

700

701

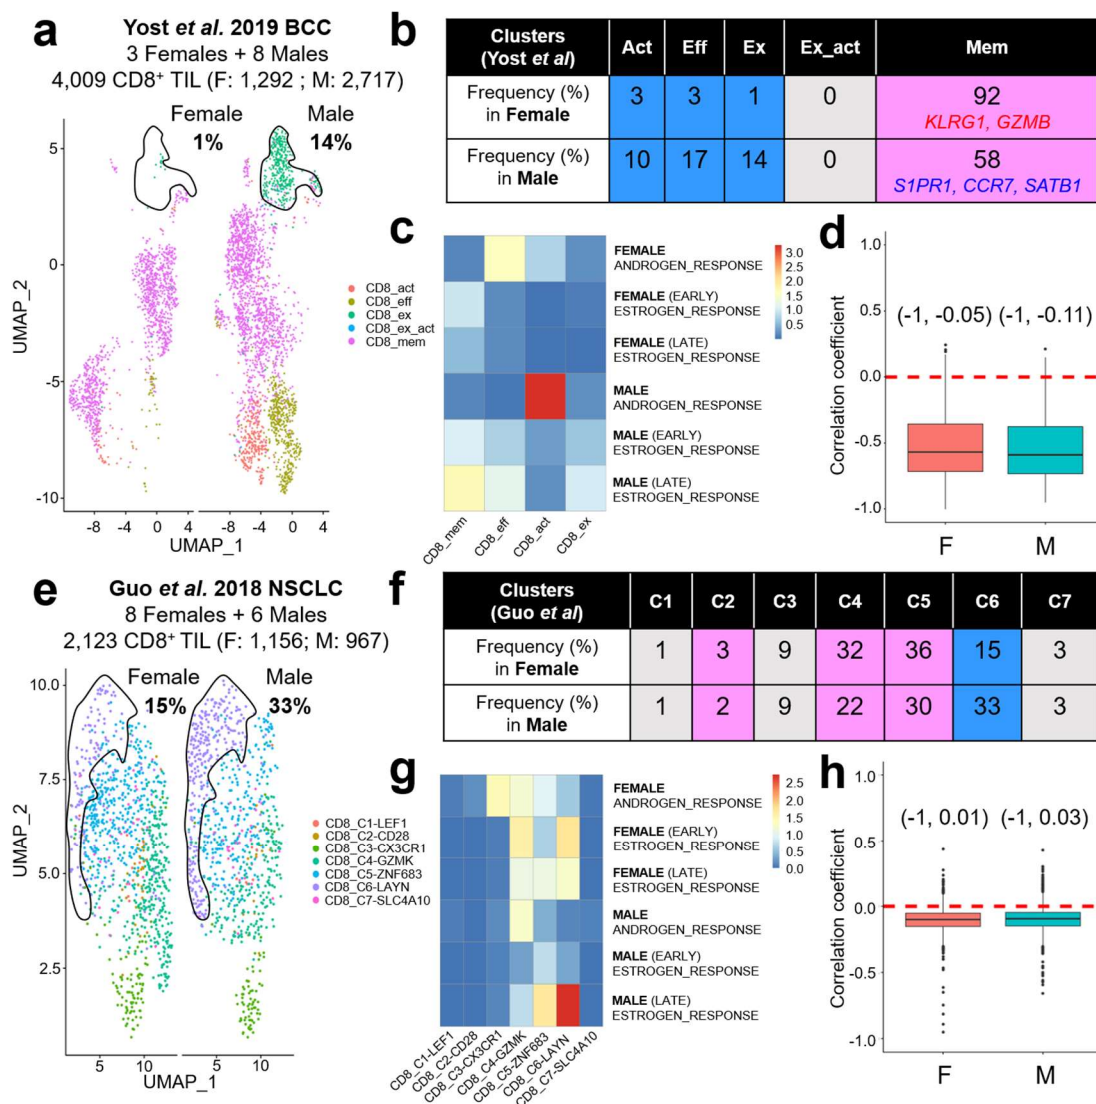

702

703 **Extended Data Fig. 5 | Male biased CD8<sup>+</sup> T cell exhaustion in human cancers.** Tumor  
 704 infiltrating CD8<sup>+</sup> T cells from basal cell carcinoma prior to immunotherapy<sup>32</sup> (a-d) and  
 705 treatment-naïve non-small cell lung cancer (e-h)<sup>33</sup>. T cell differentiation states were  
 706 annotated the same way as published and stratified based on patients' sex. Solid black  
 707 lines enclose exhausted clusters that show male-biased frequency. **a**, Act = activated, Eff  
 708 = Effector, Ex = Exhausted, Ex\_act = Exhausted/activated, Mem = Memory. **e**, C1-LEF1  
 709 = naïve, [C2-CD28, C4-GZMK, C5-ZNF683] = intermediate between naïve and effector,  
 710 C3-CX3CR1 = effector, C6-LAYN = exhausted, C7-SLC4A10 = mucosal associated  
 711 invariant T (MAIT) cells. **b** and **f**, Frequency of indicated clusters in men and women. Blue  
 712 = Male bias; Pink = Female bias; Gray = no bias. Genes listed under "Mem" show notable  
 713 sex biased expression in memory CD8<sup>+</sup> T cells. **c** and **g**, Heatmaps showing enrichment  
 714 of indicated sex hormone signatures. Colors are based on p values in  $-\log_{10}$  scale. **d**  
 715 and **h**, Correlation between androgen response and type I Interferon signatures. Numbers  
 716 indicate 95% confidence intervals.

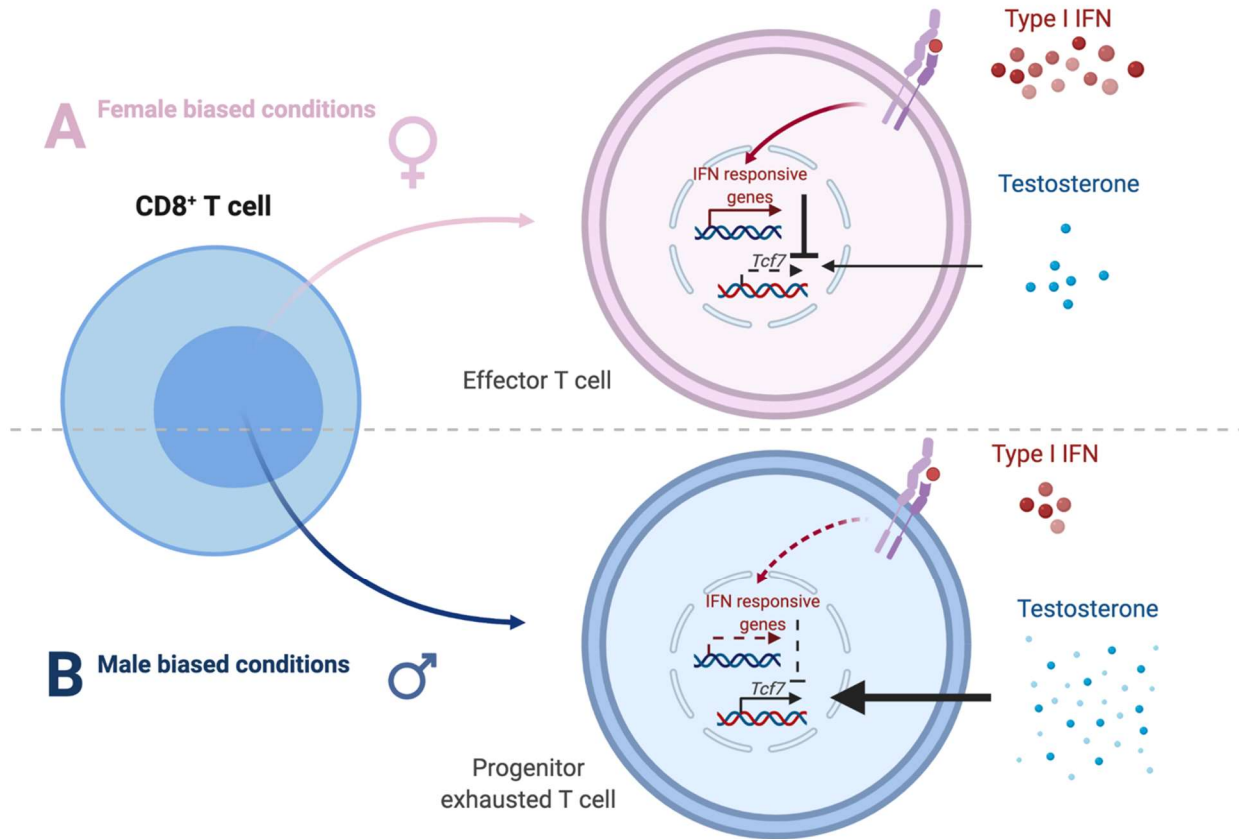

717

718 **Extended Data Fig. 6 | Schematic representation of sex differences CD8<sup>+</sup> T cell**  
719 **fate.**

720

721

722

723

724

725

726

727

728

729

730

731

732 **Supplementary Data 1 | Seurat\_list\_markers.xlsx.** Gene markers for 11 clusters of  
733 CD8<sup>+</sup> T cells from day 10 MB49 tumors.

734 **Supplementary Data 2 | pvalue\_hormone\_IFN\_by\_sex.xlsx.** P values indicating the  
735 enrichment of the following signatures in 11 clusters of CD8<sup>+</sup> T cells from day 10 MB49  
736 tumors: 1) HALLMARK ANDROGEN RESPONSE, 2) HALLMARK ESTROGEN  
737 RESPONSE EARLY, 3) HALLMARK ESTROGEN RESPONSE LATE and 4)  
738 HALLMARK INTERFERON ALPHA RESPONSE.
